# Supplementary material for: Involvement of AMP-activated protein kinase and Death Receptor 5 in TRAIL-Berberine-induced apoptosis of cancer cells
Source: PubMed Central journal article supplement (PMC5882856; doi:10.1038/s41598-018-23780-x), 2018-04-03

## Supplementary information

### **Involvement of AMP-activated protein kinase and Death Receptor 5 in TRAIL-Berberine-induced apoptosis of cancer cells**

Rong Ke<sup>1</sup>, Kanchan Vishnoi<sup>1, §</sup>, Navin Viswakarma<sup>1, §</sup>, Sreevidya Santha<sup>1, 4, §</sup>, Subhasis Das<sup>1</sup>,  
Ajay Rana<sup>1, 2, 3</sup>, Basabi Rana<sup>1, 2, 3\*</sup>

<sup>1</sup>Department of Surgery, Division of Surgical Oncology, University of Illinois at Chicago,  
Chicago, IL-60612, USA

<sup>2</sup>University of Illinois Hospital and Health Sciences System Cancer Center, University of Illinois  
at Chicago, Chicago, IL-60612, USA

<sup>3</sup> Jesse Brown VA Medical Center, Chicago, IL-60612, USA

<sup>4</sup>Present address: Department of Pharmacology & Therapeutics, Roswell Park Cancer Institute,  
Buffalo, NY 14263

§: Equal Contribution

\*To whom correspondence should be addressed: Clinical Sciences Building, MC 958, Rm. 638,  
University of Illinois at Chicago, 840 S. Wood Street, Chicago IL 60612, USA. Tel.: 312-996-  
1078; Fax: 312-996-9365; E-mail: [basrana@uic.edu](mailto:basrana@uic.edu).

## Supplementary Data:

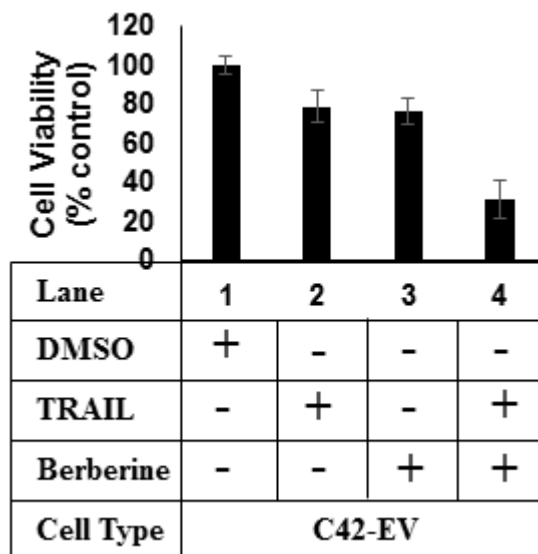

**Supplementary Figure S1: Effect of treatment with a combination of TRAIL and BBR on cancer cell viability:** C42-EV cells were treated with DMSO or TRAIL (100ng/ml) or BBR (50  $\mu$ M) alone or in combination for 16hrs and subjected to MTT assay. The results were expressed as percentage of control considering the vehicle-treated values as 100%. Each treatment was performed in triplicate and each experiment was repeated at least two times. The data represent the mean  $\pm$  S.D. of two independent experiments.

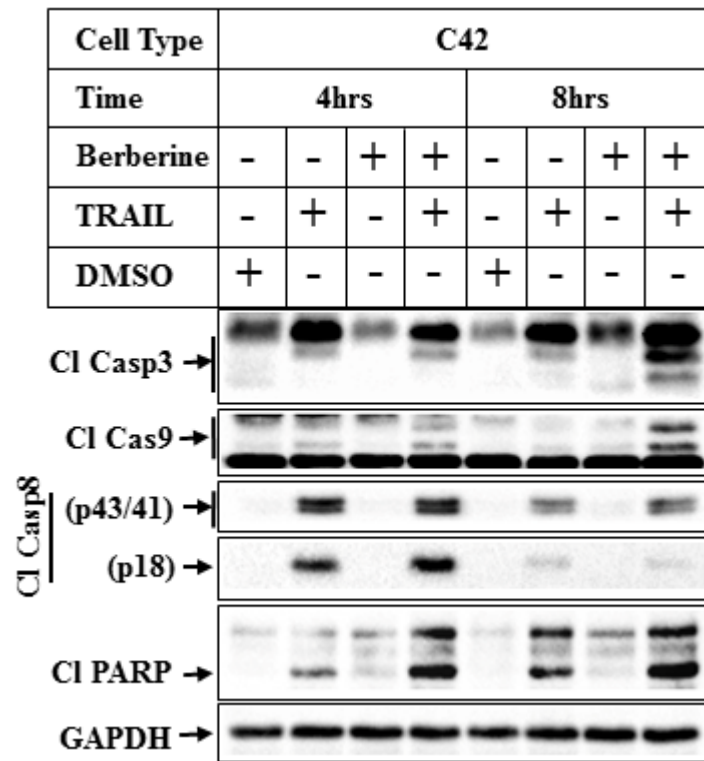

**Supplementary Figure S2: *Effect of treatment with TRAIL and BBR alone or in combination on cancer cell apoptosis:*** Confluent populations of C42 cells were treated with DMSO or TRAIL or BBR alone or in combination for the indicated periods of time followed by Western blot analysis.

| Position   | Gene Symbol  | Fold Regulation | Position   | Gene Symbol      | Fold Regulation |
|------------|--------------|-----------------|------------|------------------|-----------------|
| A01        | ABL1         | 2.05            | D08        | CIDEA            | 2.0498          |
| A02        | AIFM1        | 2.886           | D09        | CIDEB            | 2.9099          |
| A03        | AKT1         | 2.1168          | D10        | CRADD            | 2.7543          |
| A04        | APAF1        | 2.1826          | D11        | CYCS             | 2.6164          |
| A05        | BAD          | 2.4048          | D12        | DAPK1            | 5.3724          |
| A08        | BAK1         | 3.039           | E02        | DIABLO           | 2.6221          |
| A09        | BAX          | 2.51            | E04        | FAS              | 4.5068          |
| A10        | BCL10        | 2.123           | <b>E06</b> | <b>GADD45A</b>   | <b>11.3551</b>  |
| B01        | BCL2L1       | 2.757           | <b>E07</b> | <b>HRK</b>       | <b>14.6908</b>  |
| B02        | BCL2L10      | 6.3409          | E08        | IGF1R            | 2.5768          |
| B04        | BCL2L2       | 3.4564          | E10        | LTA              | 4.7468          |
| B05        | BFAR         | 2.2731          | E11        | LTBR             | 3.6082          |
| B06        | BID          | 2.3564          | E12        | MCL1             | 4.7006          |
| B08        | BIRC2        | 3.4632          | F01        | NAIP             | 2.5623          |
| B09        | BIRC3        | 2.4195          | F02        | NFKB1            | 2.6582          |
| B10        | BIRC5        | 2.3974          | F03        | NOD1             | 2.1217          |
| B11        | BIRC6        | 3.9033          | F04        | NOL3             | 2.6115          |
| B12        | BNIP2        | 3.2653          | F06        | RIPK2            | 3.0439          |
| C01        | BNIP3        | 2.7378          | F07        | TNF              | 5.0396          |
| C02        | BNIP3L       | 2.454           | <b>F09</b> | <b>TNFRSF10B</b> | <b>8.6961</b>   |
| C03        | BRAF         | 5.1957          | F10        | TNFRSF11B        | 4.8171          |
| C04        | CASP1        | 4.6151          | F11        | TNFRSF1A         | 3.8417          |
| C05        | CASP10       | 2.4005          | G03        | TNFRSF9          | 2.8564          |
| C07        | CASP2        | 2.1163          | <b>G05</b> | <b>TNFSF8</b>    | <b>7.7553</b>   |
| C08        | CASP3        | 2.3449          | G06        | TP53             | 2.7249          |
| C09        | CASP4        | 2.6958          | G07        | TP53BP2          | 3.1439          |
| <b>C10</b> | <b>CASP5</b> | <b>15.2681</b>  | G10        | TRAF2            | 2.7438          |
| C11        | CASP6        | 2.2372          | G11        | TRAF3            | 3.0301          |
| C12        | CASP7        | 2.1169          | G12        | XIAP             | 3.6155          |
| D01        | CASP8        | 2.9183          | H03        | GAPDH            | 3.4984          |
| D02        | CASP9        | 4.0091          | H04        | HPRT1            | 2.0003          |
| D04        | CD40         | 2.5062          | H05        | RPLP0            | 3.0532          |
| D07        | CFLAR        | 3.1216          | H06        | HGDC             | 5.6257          |

|            |                 |                |
|------------|-----------------|----------------|
| <b>F12</b> | <b>TNFRSF1B</b> | <b>-4.1387</b> |
|------------|-----------------|----------------|

**Supplementary Figure S3: *RT*<sup>2</sup> Profiler PCR Array analysis of human apoptotic gene expression:** Total RNA extracted from LNCaP cells treated with DMSO or BBR (as described in Figs 5A, B) was subjected to cDNA synthesis and analyzed by human apoptosis PCR Array (PAHS-012Z). List above showing the genes with a fold change of >2 (and a *P*-value of <0.05) with some of the highly upregulated genes marked in red and the downregulated gene marked in green. **Gene Abbreviations:** **CASP5**, Caspase 5, apoptosis-related cysteine peptidase; **GADD45A**, Growth arrest and DNA-damage-inducible, alpha; **HRK**, Harakiri, BCL2 interacting protein (contains only BH3 domain); **TNFRSF10B**, Tumor necrosis factor receptor superfamily, member 10b; **TNFSF8**, Tumor necrosis factor (ligand) superfamily, member 8; **TNFRSF1B**, Tumor necrosis factor receptor superfamily, member 1B.

## Supplementary Table S1

**Table S1: Primers Used for qPCR analysis**

| <b>Primers</b> | <b>Forward</b>            | <b>Reverse</b>             |
|----------------|---------------------------|----------------------------|
| hHRK           | 5' CAGGCGGAACTTGTAGGAAC   | 5' CCAGCTTTCTCCAAGGACAC    |
| hDR4           | 5' GGGTCCACAAGACCTTCAAGT  | 5' GACACAACCTCTCCCAAAGGG   |
| hDR5           | 5' AGACCCTTGTGCTCGTTGTC   | 5' TTGTTGGGTGATCAGAGCAG    |
| h18S           | 5' GGCCCTGTAATTGGAATGAGTC | 5' CCAAGATCCAACACTACGAGCTT |

## Supplementary Table S2

**Table S2: Data for qPCR analysis**

| Target | Time (h) | DMSO (N=3)<br>(Mean $\pm$ S.D.) | 50 $\mu$ M BBR (N=3)<br>(Mean $\pm$ S.D.) | <i>P</i> value |
|--------|----------|---------------------------------|-------------------------------------------|----------------|
| hHRK   | 2        | 0.001668 $\pm$ 0.0004377        | 0.001215 $\pm$ 0.0004963                  | ns             |
|        | 4        | 0.003228 $\pm$ 0.0005515        | 0.004272 $\pm$ 0.001459                   | ns             |
|        | 8        | 0.002386 $\pm$ 0.0003599        | 0.004928 $\pm$ 0.0007747                  | 0.0409*        |
|        | 16       | 0.001492 $\pm$ 0.0005145        | 0.02853 $\pm$ 0.001838                    | 0.0001***      |
| hDR4   | 2        | 0.001756 $\pm$ 0.0001083        | 0.002801 $\pm$ 0.001213                   | ns             |
|        | 4        | 0.002256 $\pm$ 0.0004200        | 0.001655 $\pm$ 0.0001928                  | ns             |
|        | 8        | 0.002431 $\pm$ 0.0005276        | 0.004455 $\pm$ 0.001487                   | ns             |
|        | 16       | 0.001925 $\pm$ 0.0002436        | 0.003780 $\pm$ 0.0005128                  | 0.0309*        |
| hDR5   | 2        | 0.01537 $\pm$ 0.004226          | 0.02412 $\pm$ 0.004059                    | ns             |
|        | 4        | 0.02732 $\pm$ 0.01297           | 0.02763 $\pm$ 0.003707                    | ns             |
|        | 8        | 0.01877 $\pm$ 0.003450          | 0.04316 $\pm$ 0.0008783                   | 0.0024**       |
|        | 16       | 0.01498 $\pm$ 0.004821          | 0.04465 $\pm$ 0.002123                    | 0.0049**       |

*Note:* Significant differences in each treatment between DMSO and BBR, determined by *t*-test, are indicated: ns,  $P > 0.05$ , \*  $P \leq 0.05$ , \*\*  $P \leq 0.01$ , \*\*\*  $P \leq 0.001$ .

**Supplementary Figs S4-S7- Full length uncropped blots used in this study**

## Supplementary Fig S4

**Figure- 2A**

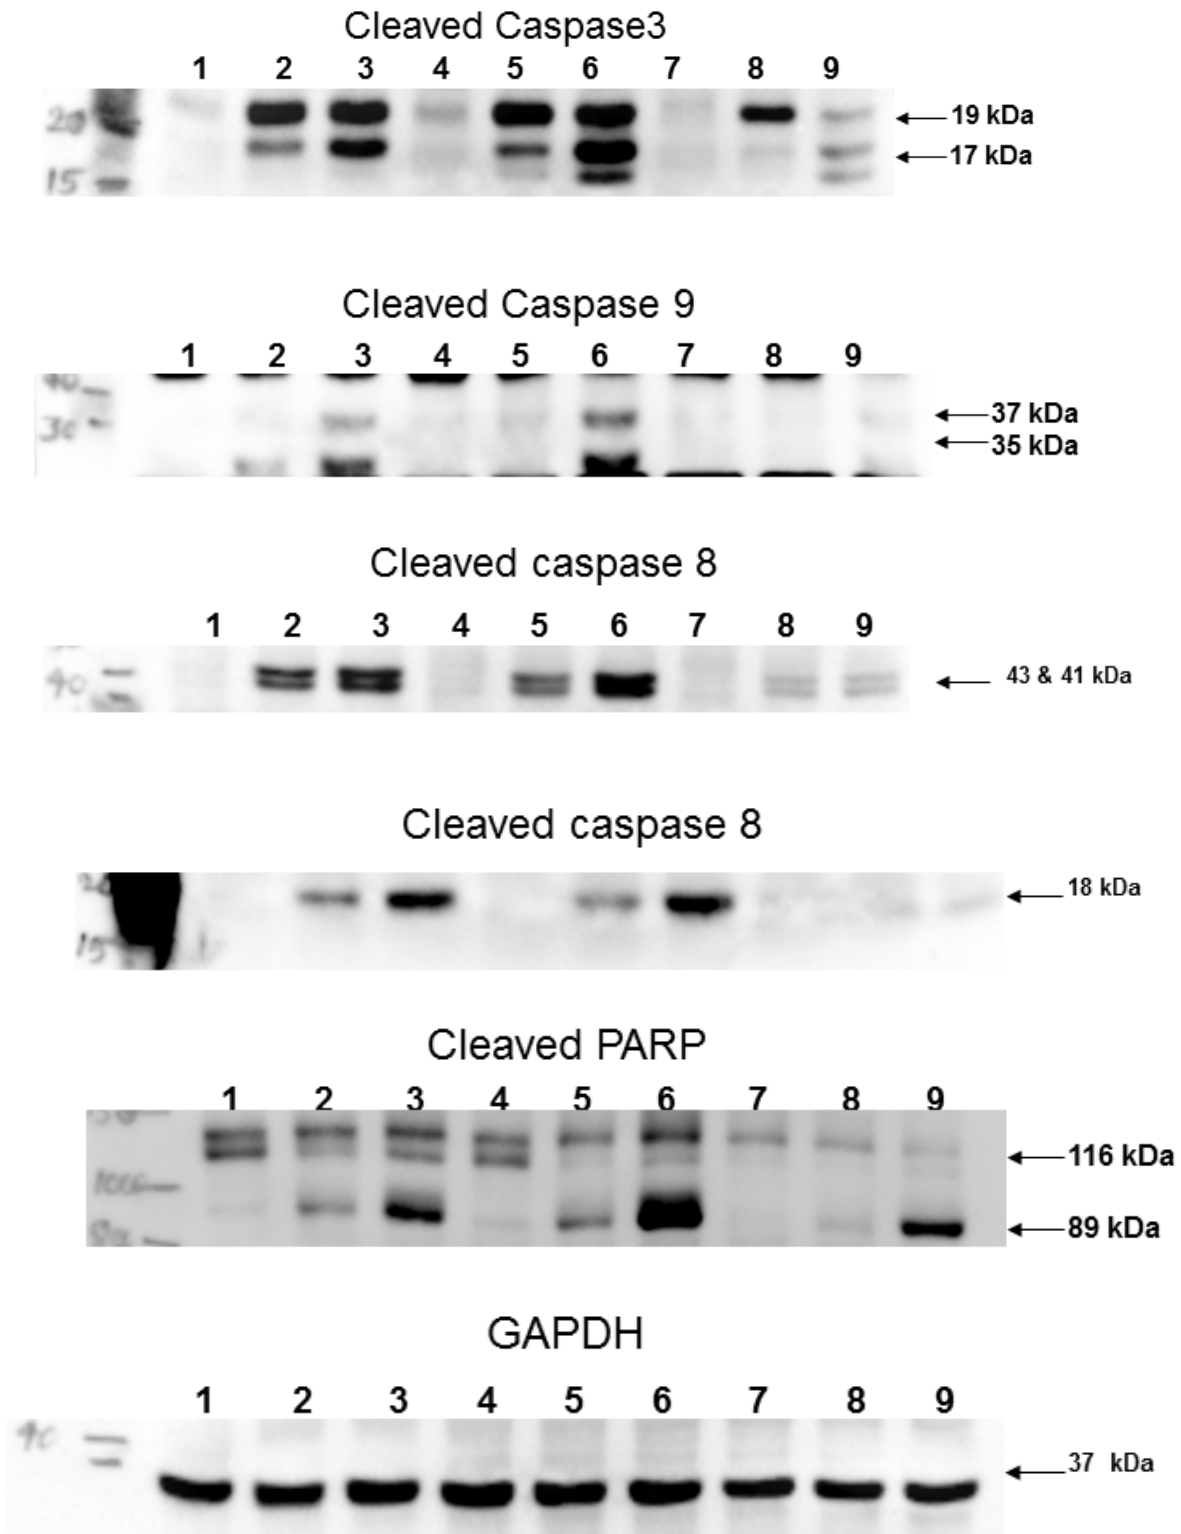

**Figure- 2B**

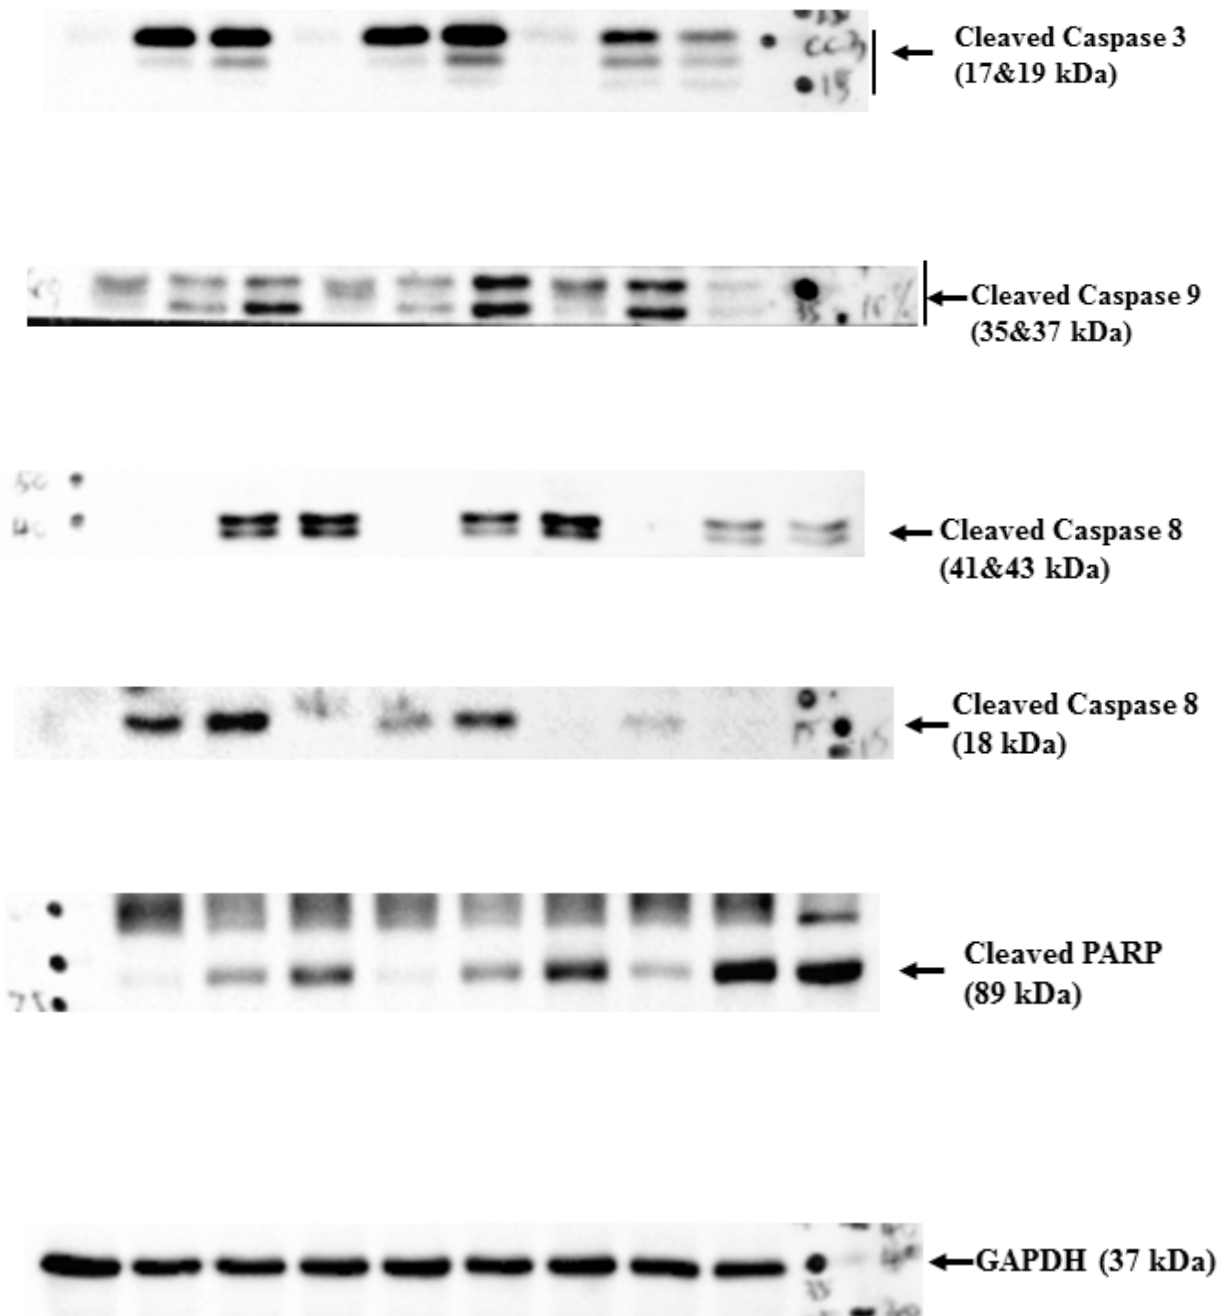



**Figure- 2C**

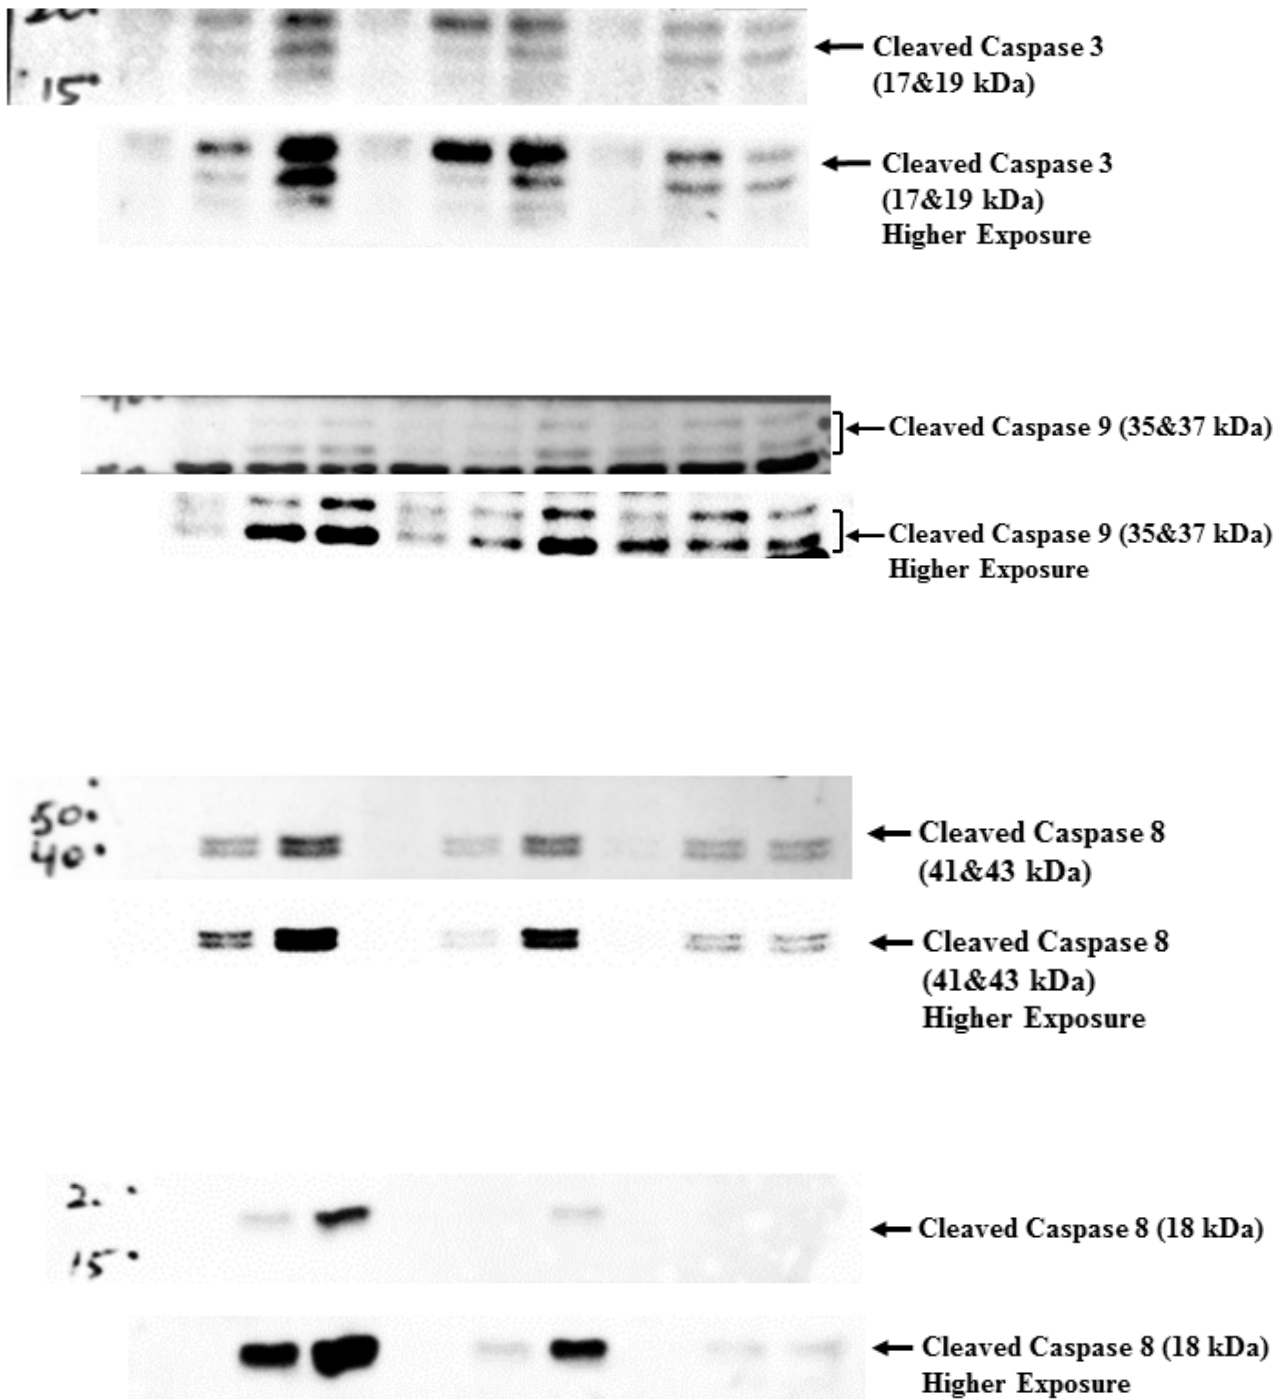

Figure- 2C contd.

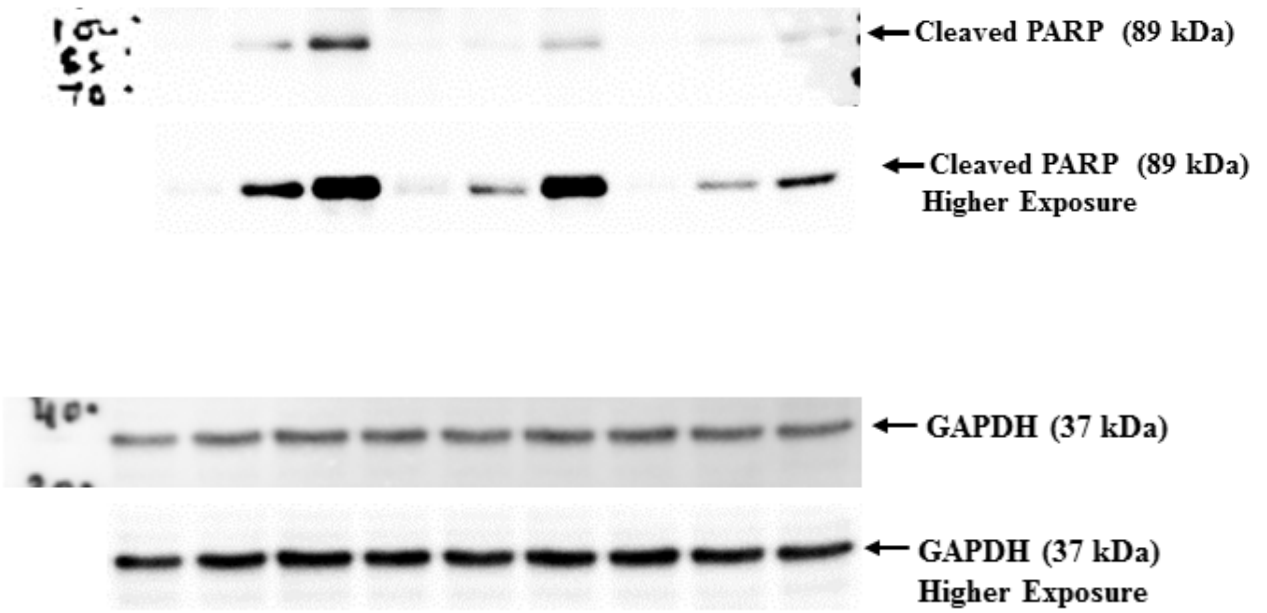

**Figure- 2D**

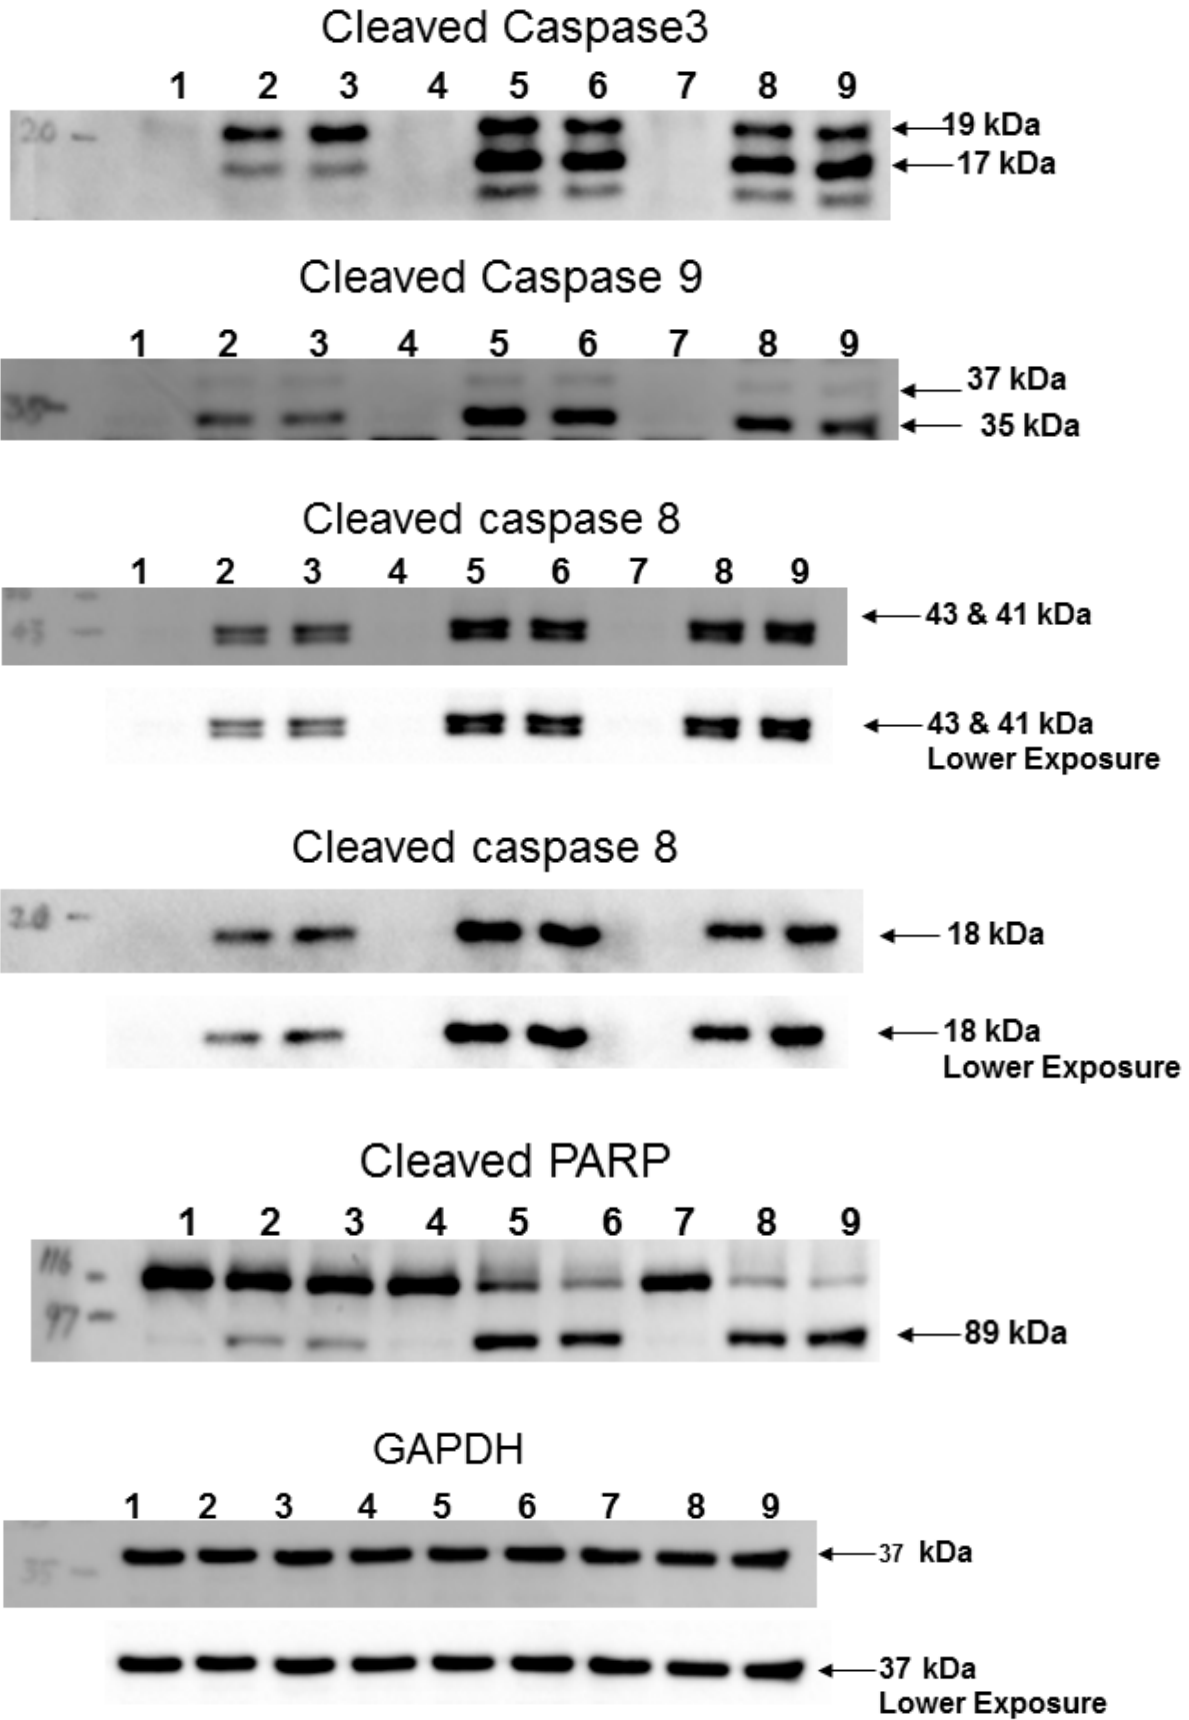

# Supplementary Fig S5

**Figure- 3A**

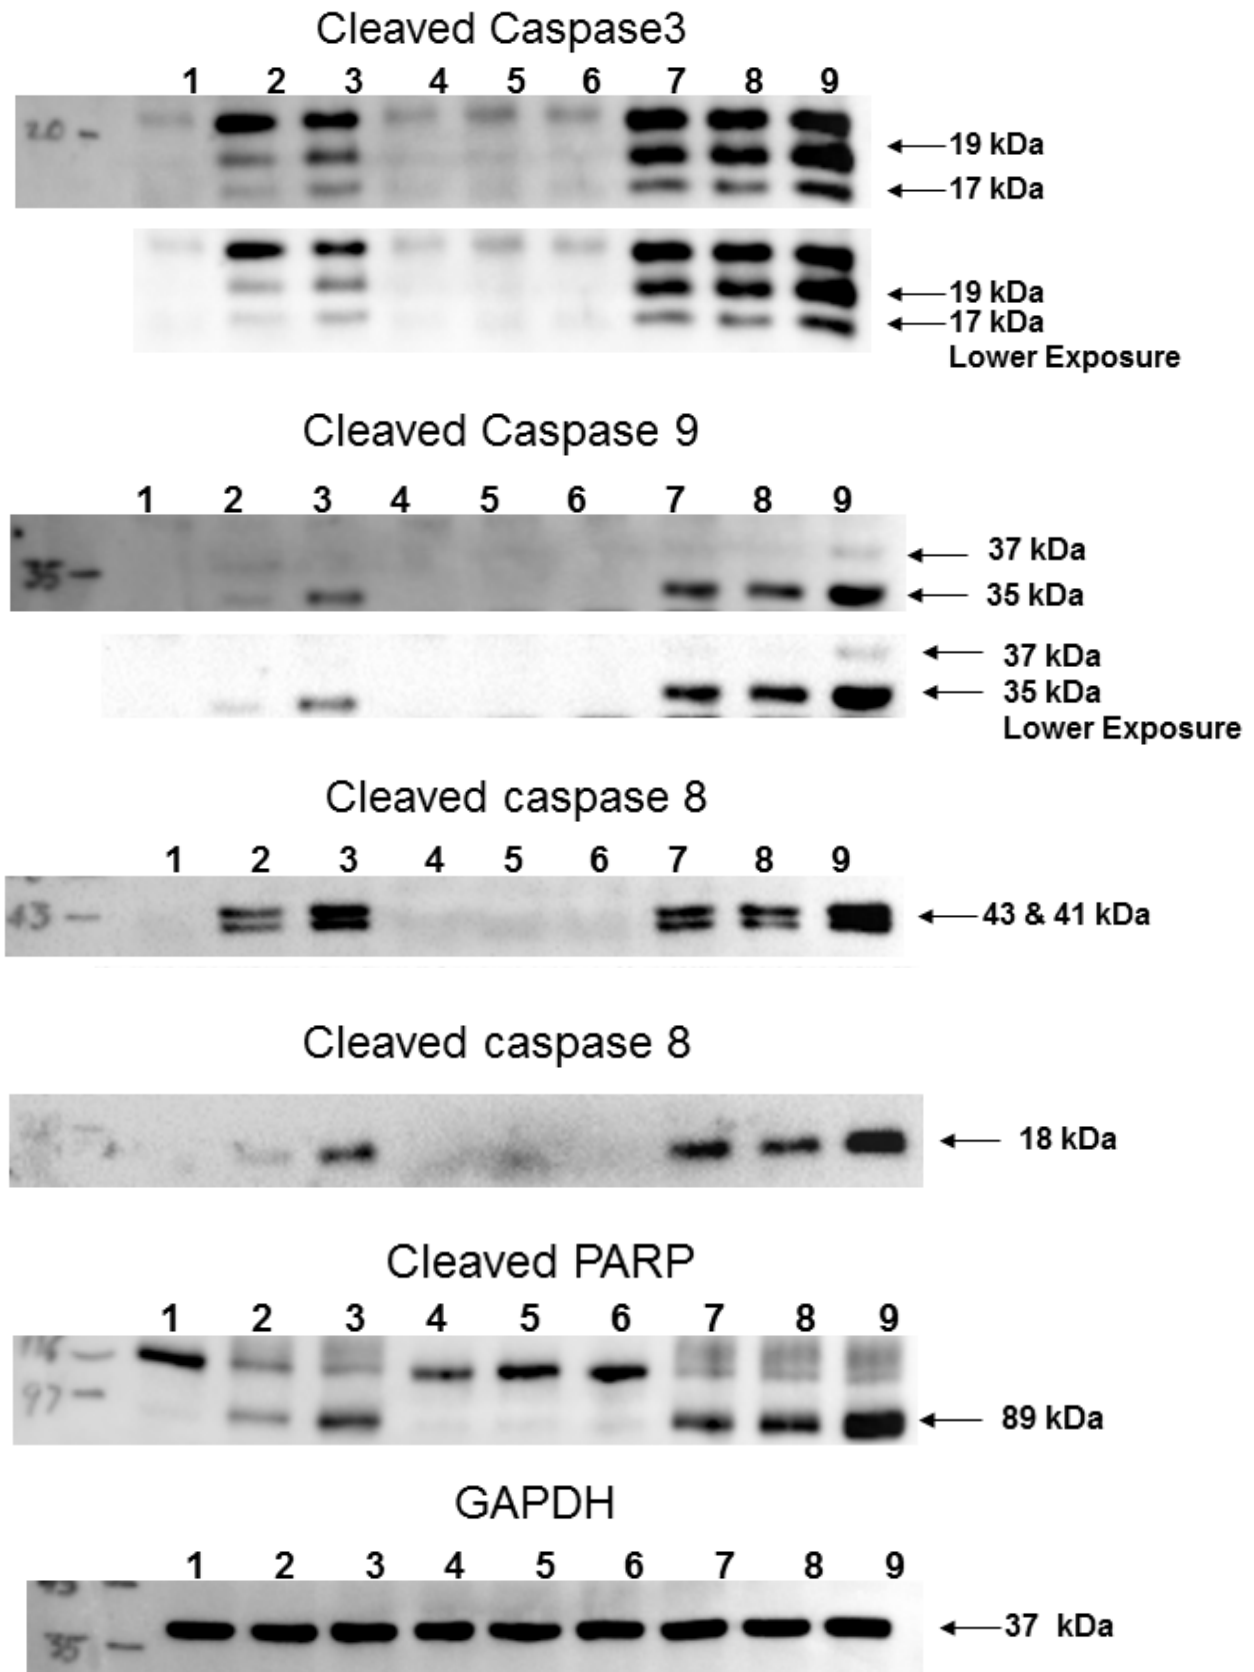

**Figure- 3B**

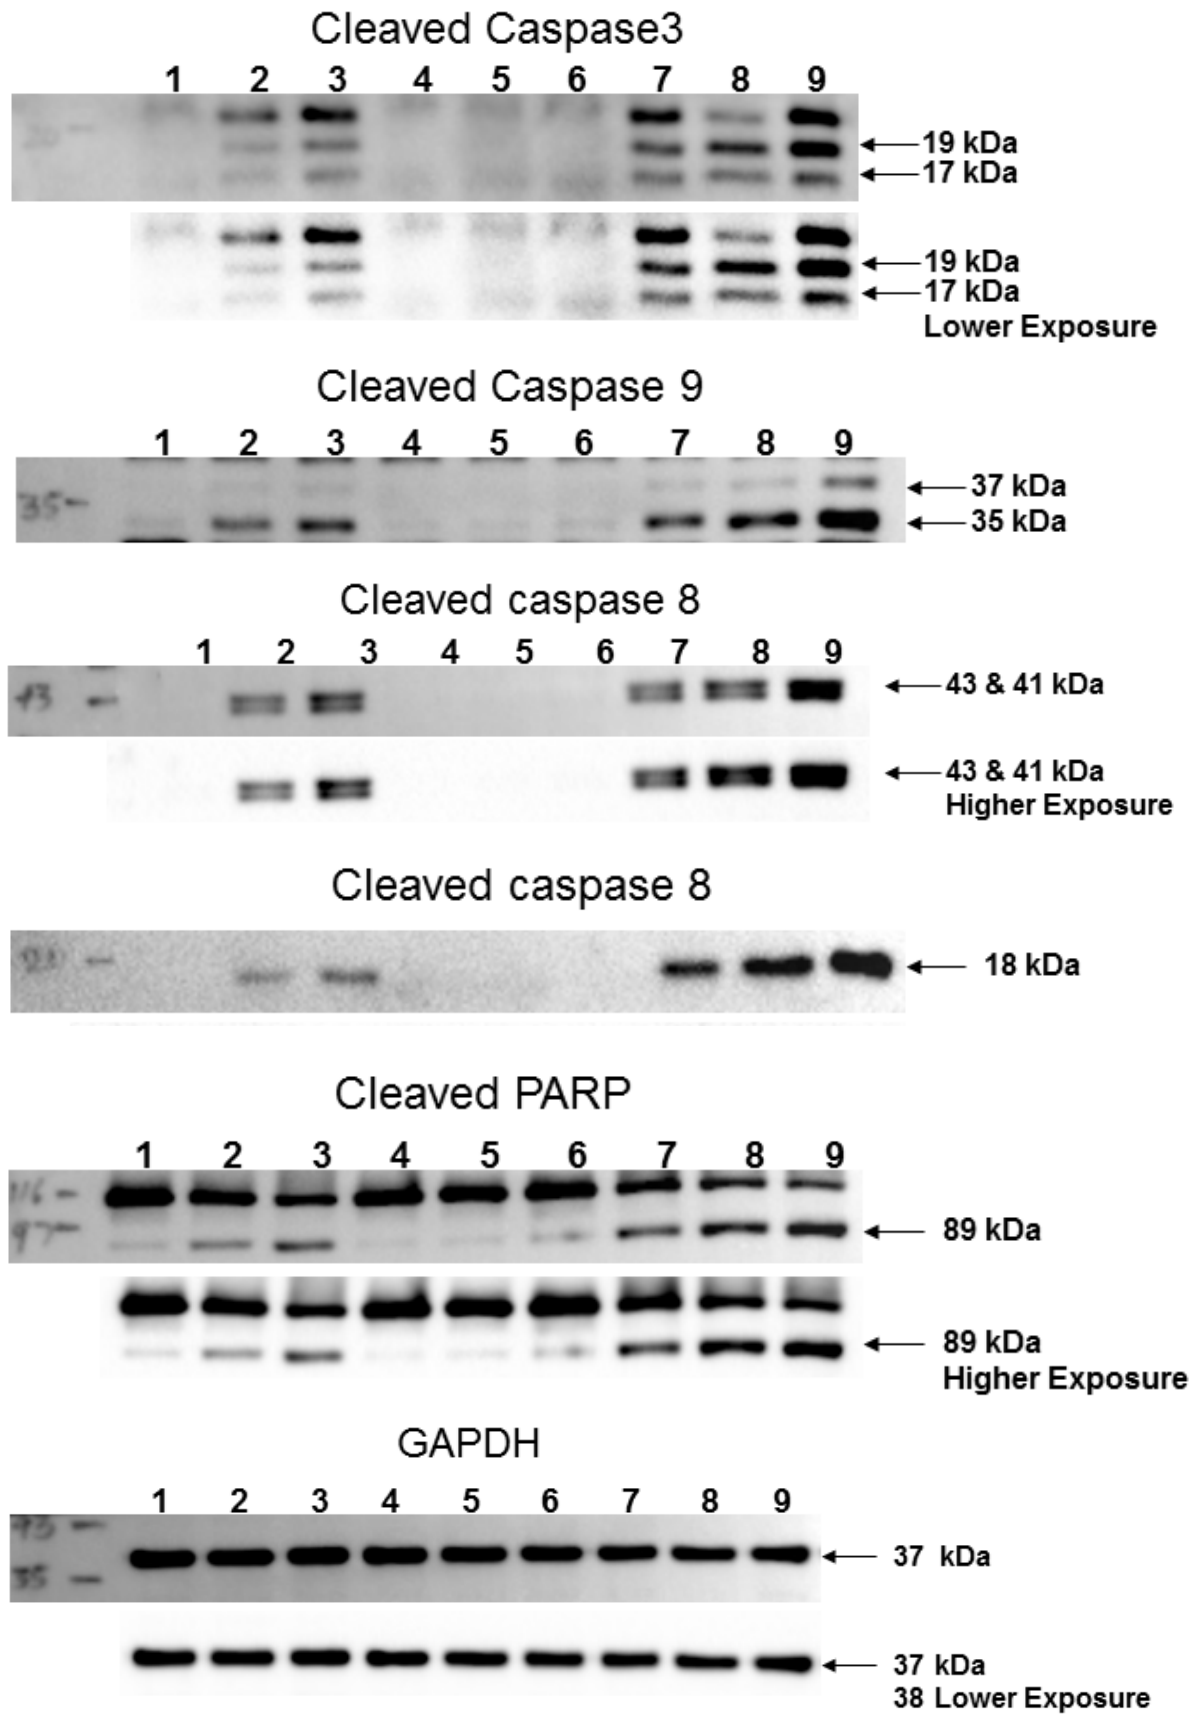

# Supplementary Fig S6

**Figure- 4A**

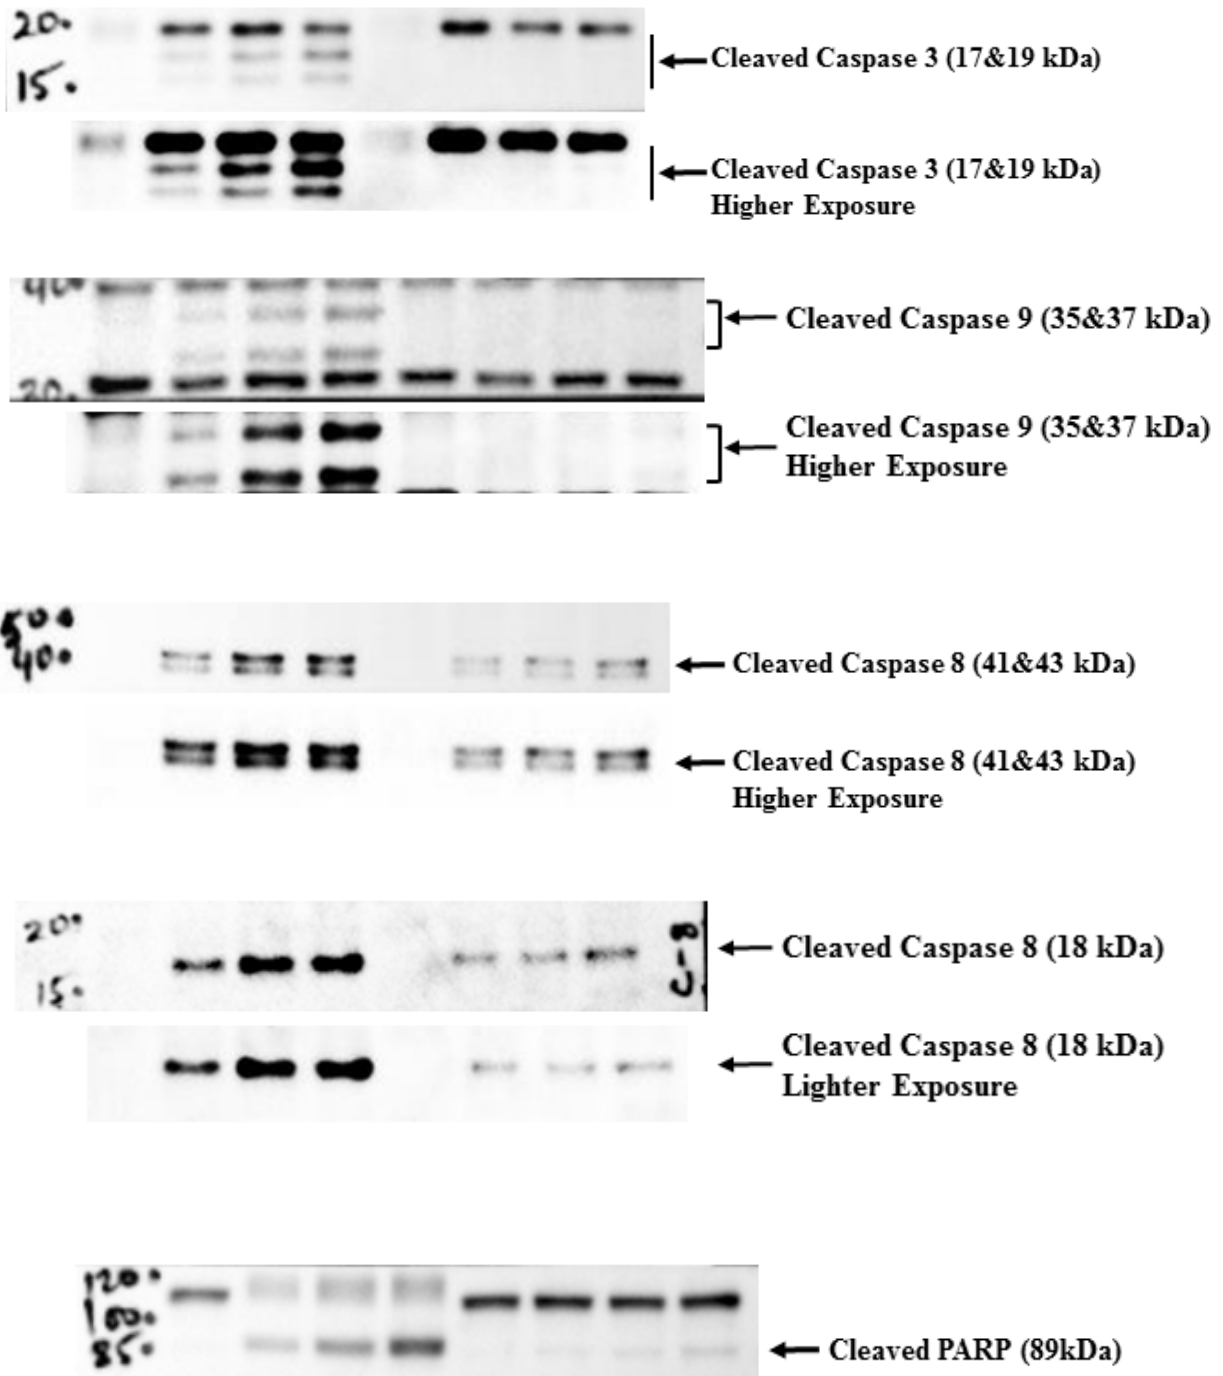

**Figure- 4A contd.**

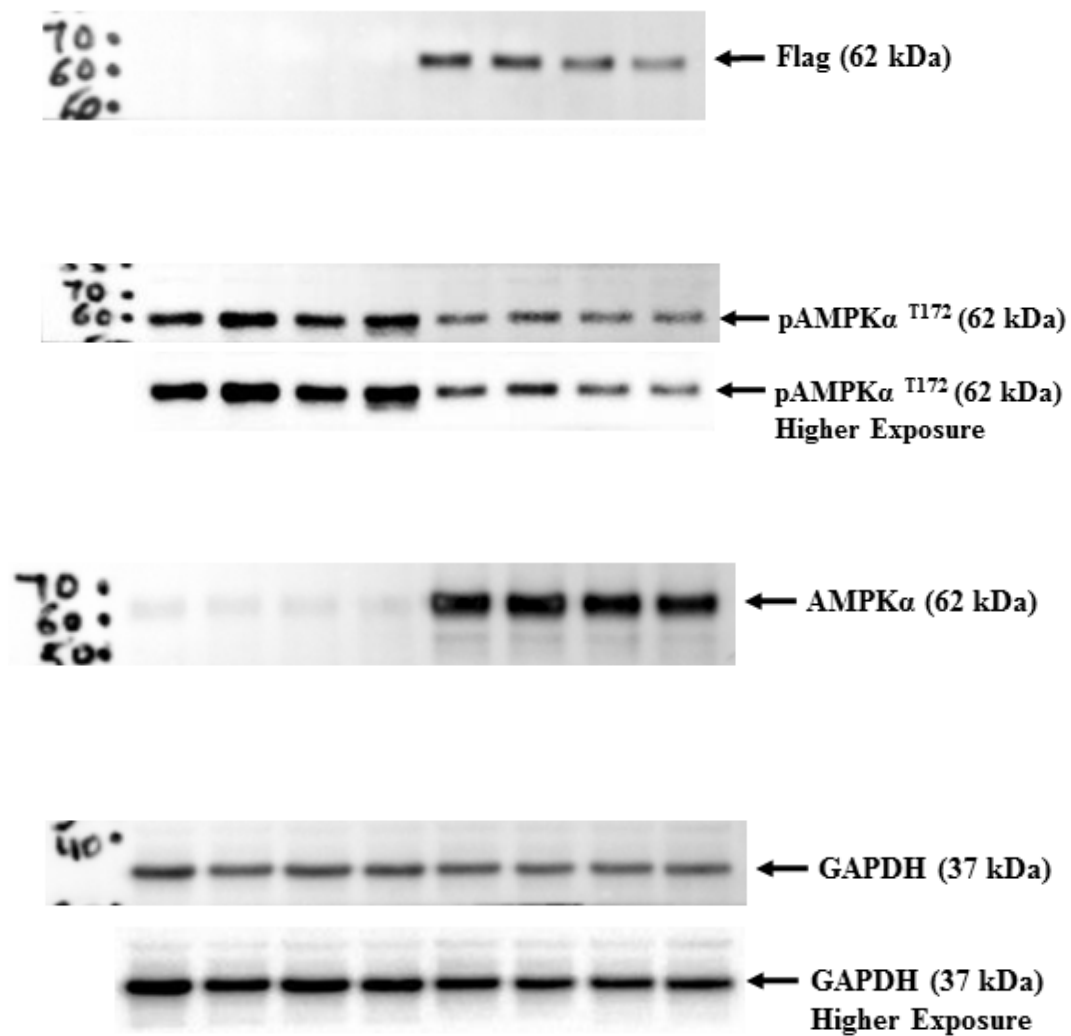

**Figure- 4B**

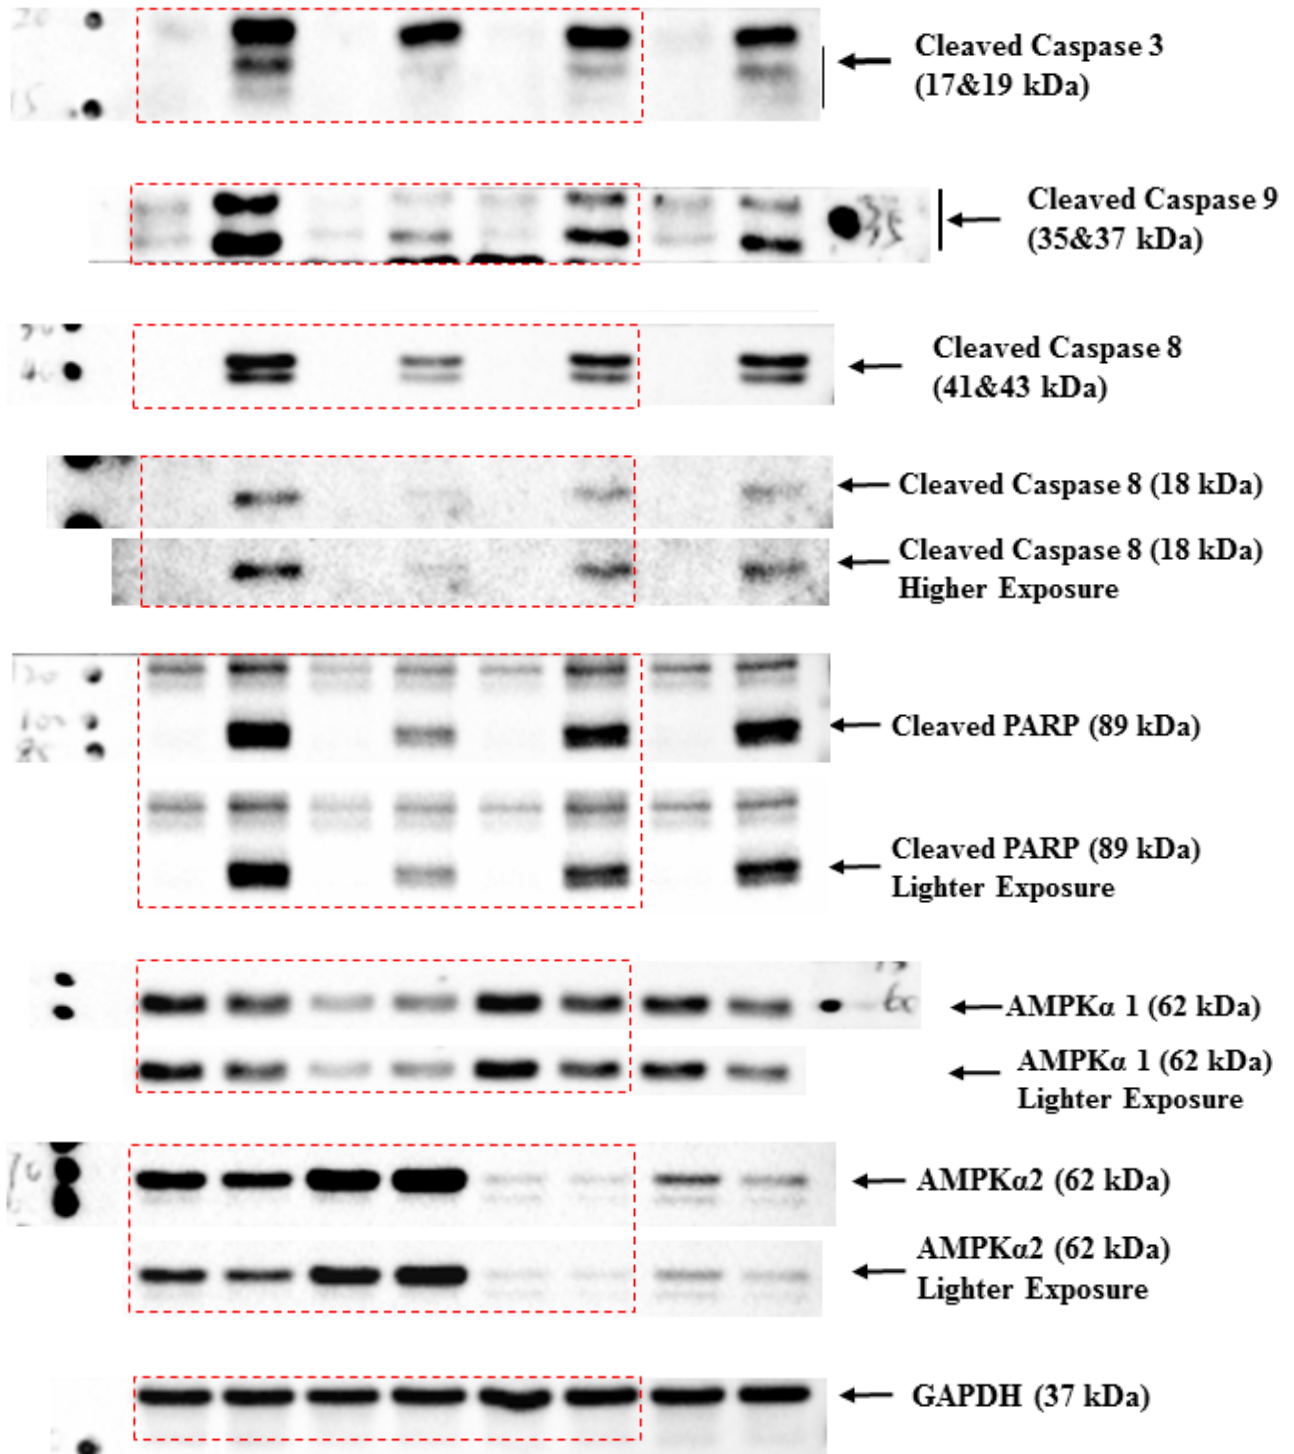



## Supplementary Fig S7

**Figure- 7A**

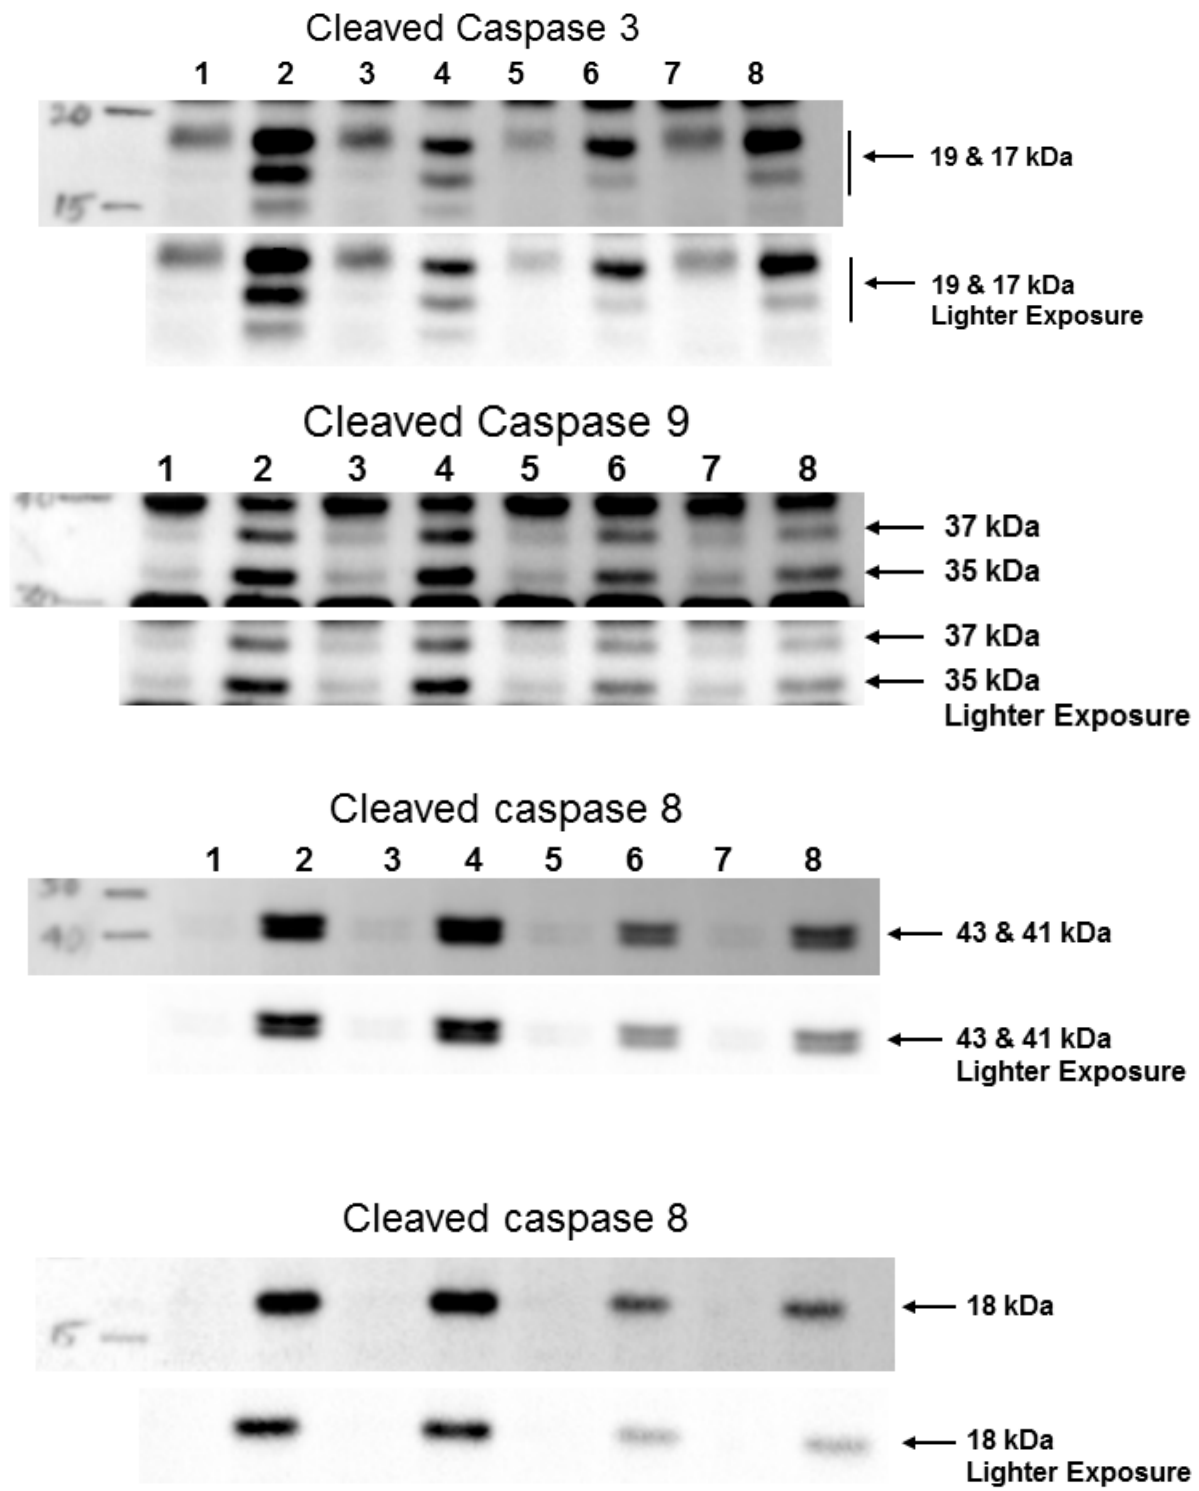

**Figure- 7A contd.**

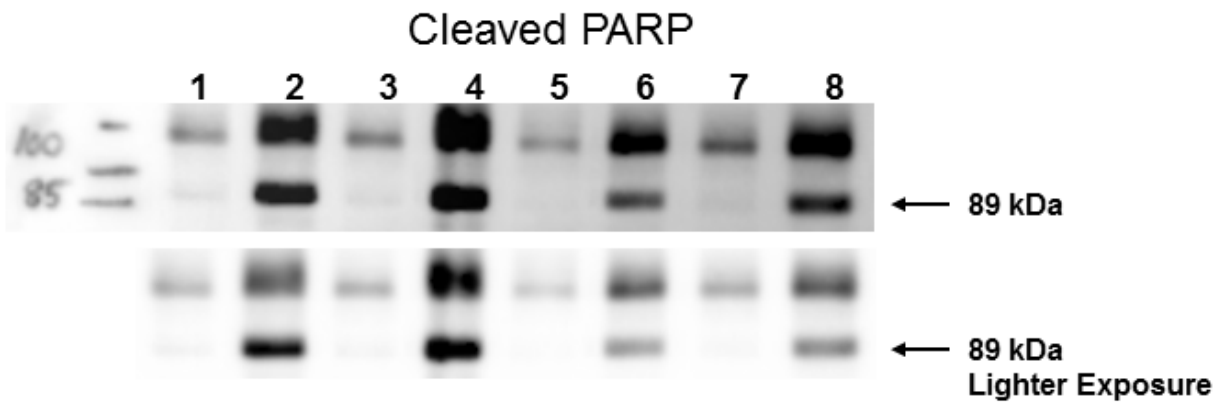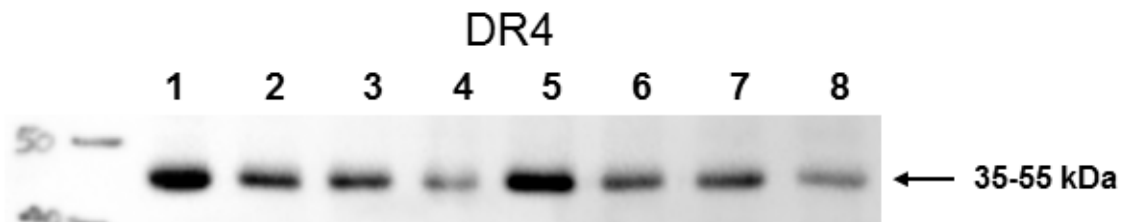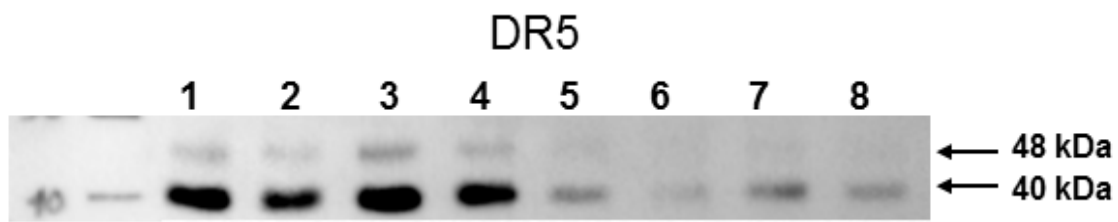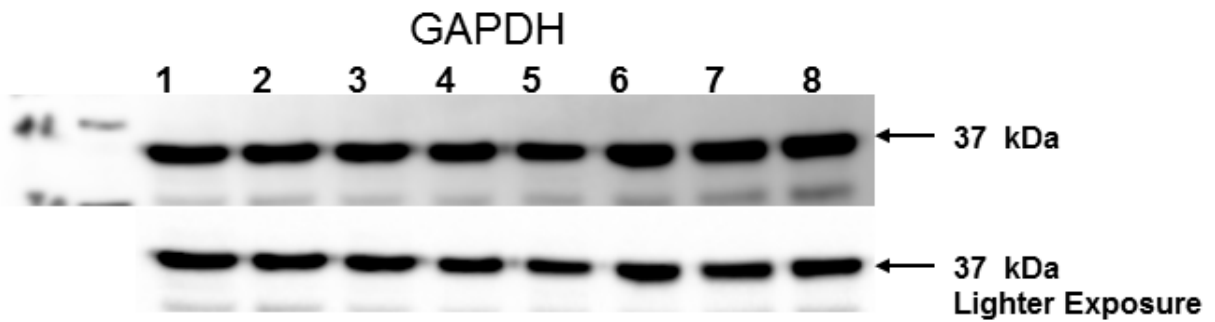

**Figure- 7B**

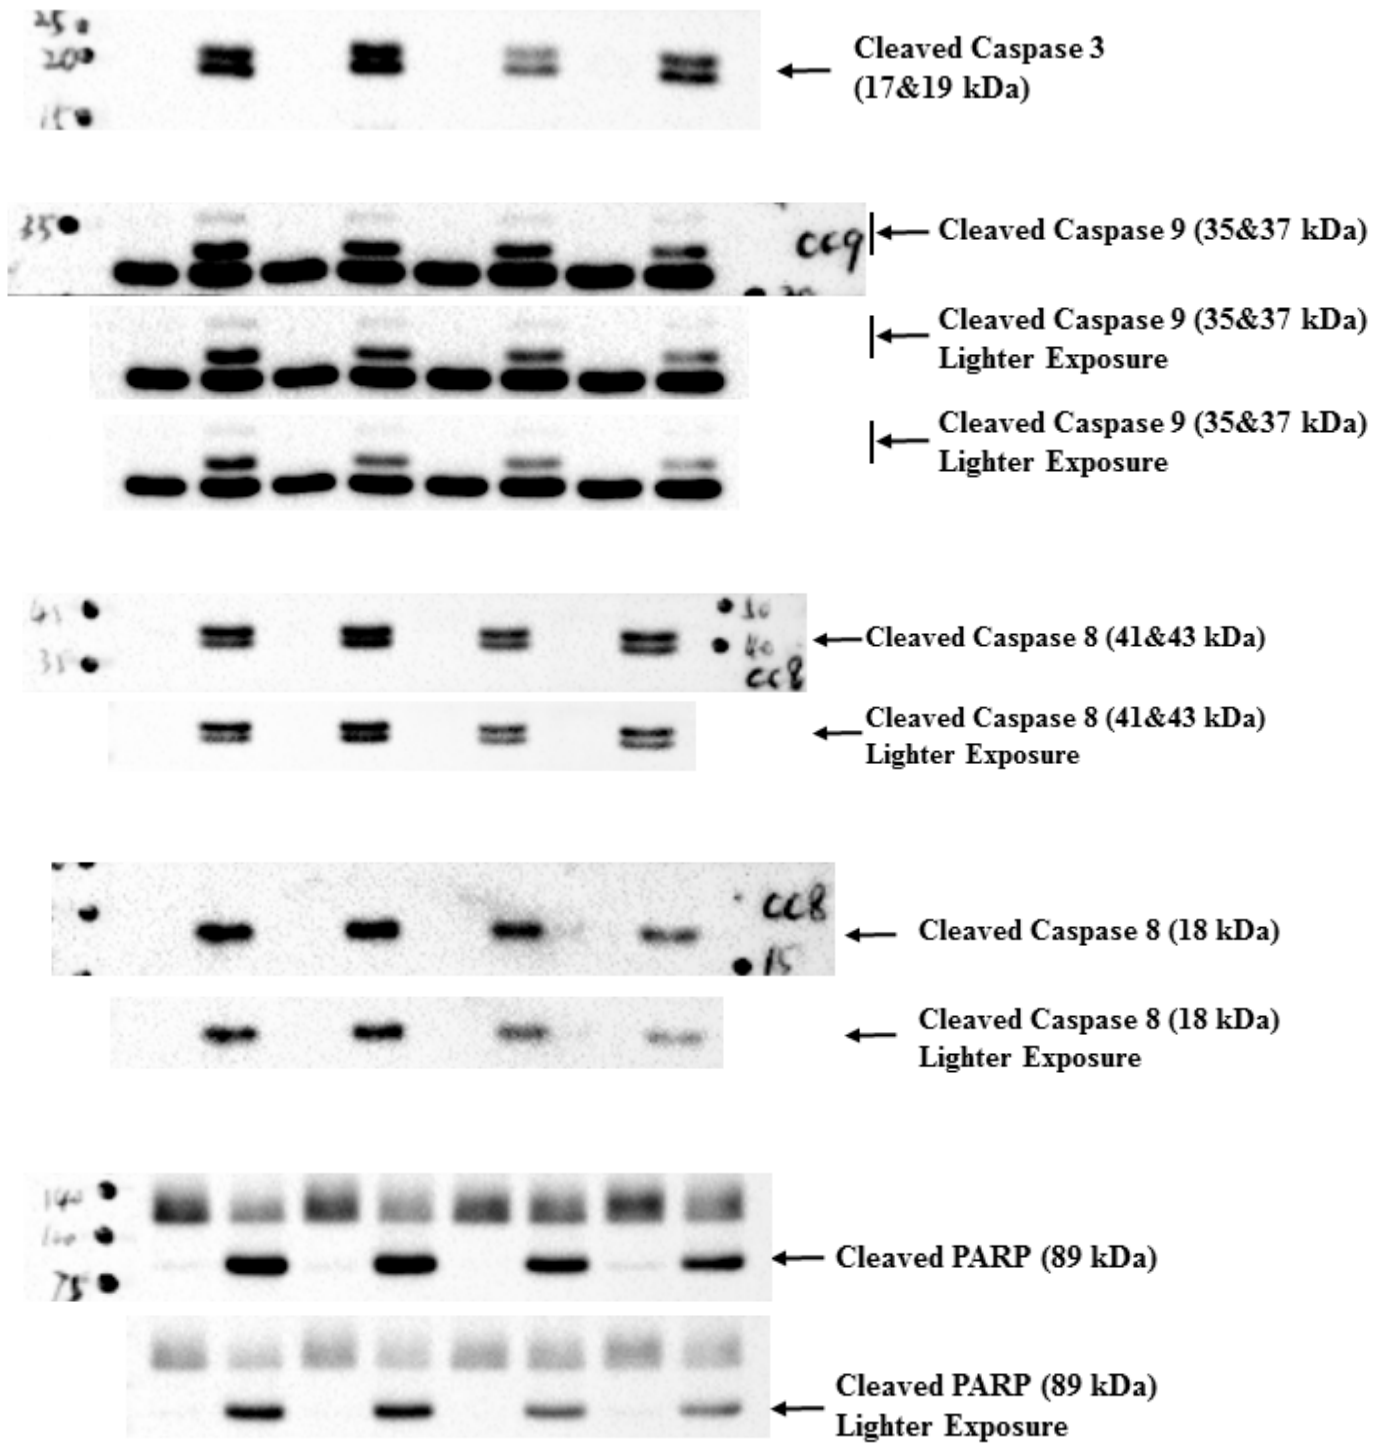

**Figure- 7B contd.**

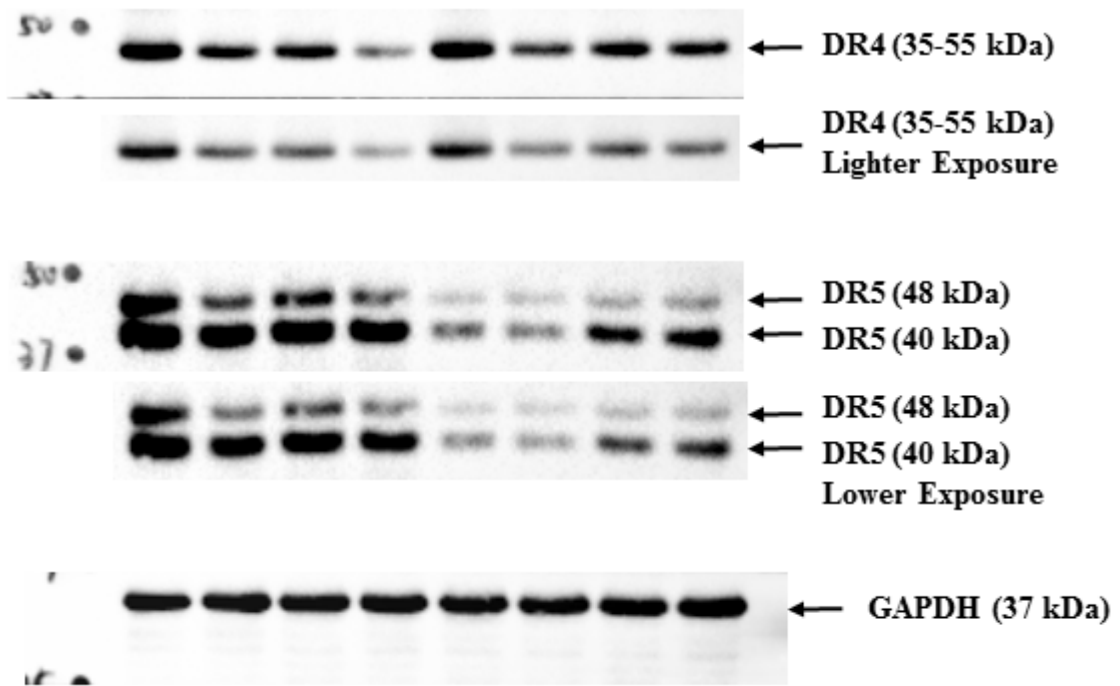

Supplement: 41598_2018_23780_MOESM1_ESM.pdf [file 41598_2018_23780_MOESM1_ESM.pdf]
